# Supplementary material
Source: PubMed Central journal article supplement (PMC10157509)
Supplement: jamacardiol-e230857-s001.pdf [file jamacardiol-e230857-s001.pdf]

## Supplementary Online Content

Vassy JL, Posner DC, Ho YL, et al. Cardiovascular disease risk assessment using traditional risk factors and polygenic risk scores in the million veteran program. *JAMA Cardiol*. Published online May 3, 2023. doi:10.1001/jamacardio.2023.0857

**eTable 1.** Genetically Informed Ancestry (GIA) and HARE Classification in the Million Veteran Program (MVP)

**eTable 2.** Electronic Health Record Codes (*ICD-9, ICD-10, CPT/HCPCS*) for ASCVD Outcomes

**eTable 3.** Baseline Characteristics and ASCVD Events Stratified by Sex

**eTable 4.** Hazard Ratios for MVP Incident ASCVD Events for Low Traditional and Polygenic Risk Scores

**eTable 5.** Reclassification of 5-Year Predicted Myocardial Infarction Including Both Statin-Naïve and Statin Users

**eTable 6.** Reclassification of 5-Year Predicted Acute Ischemic Stroke Including Both Statin-Naïve and Statin Users

**eTable 7.** Reclassification of 5-Year Predicted ASCVD Death Including Both Statin-Naïve and Statin Users

**eTable 8.** Net Reclassification Improvement From Inclusion of Polygenic Scores Stratified by Age and Sex

**eFigure 1.** Cumulative Incidence of ASCVD Events

**eFigure 2.** Categorical Net Reclassification Index for Incident Composite ASCVD Among Statin-Naïve Participants Outcomes Stratified by Age Group

**eFigure 3.** Net Reclassification Index for Intermediate Risk (5-Year Risk >3.75%) From Inclusion of Polygenic Risk Scores Including Statin Users Stratified by Age

**eFigure 4.** Age of Onset for Incident ASCVD

**eFigure 5.** Continuous and Categorical Net Reclassification Index for Incident ASCVD Outcomes

This supplementary material has been provided by the authors to give readers additional information about their work.

**eTable 1. Genetically Informed Ancestry (GIA) and HARE Classification in the Million Veteran Program (MVP)**

|                                                        |                    | Genetically Informed Ancestry (GIA) |       |         |        |       | HARE total<br>(not NA) |
|--------------------------------------------------------|--------------------|-------------------------------------|-------|---------|--------|-------|------------------------|
|                                                        |                    | AFR                                 | EAS   | EUR     | AMR    | NA    |                        |
| Harmonized<br>Ancestry and<br>Race/Ethnicity<br>(HARE) | Non-Hispanic Black | 122,114                             | 0     | 0       | 181    | 825   | 122,295                |
|                                                        | Asian              | 2                                   | 6,684 | 32      | 25     | 1,586 | 6,743                  |
|                                                        | Non-Hispanic White | 3                                   | 1     | 456,030 | 5,650  | 3,277 | 461,684                |
|                                                        | Hispanic           | 190                                 | 28    | 485     | 51,195 | 285   | 51,898                 |
|                                                        | NA                 | 1,019                               | 363   | 1,173   | 4,060  | 3,374 |                        |
| GIA Total (not NA)                                     |                    | 122,309                             | 6,713 | 456,547 | 57,051 |       |                        |

\* GIA super populations: AFR = African, EAS = East Asian, EUR = European, AMR = Ad Mixed American

**eTable 1 caption:** Agreement between HARE and GIA classifications were very high (>99%) for all ancestries except the AMR (Ad Mixed American) super population. 5,650 participants from the AMR-ancestry were classified as non-Hispanic White by the HARE algorithm, and a further 4,060 were excluded due to disagreement between self-identified race/ethnicity and GIA.

**eTable 2. Electronic Health Record Codes (ICD-9, ICD-10, CPT/HCPCS) for ASCVD Outcomes**

| Outcome                               | ICD-9 Codes                                                                           | ICD-10 Codes                                                                  | CPT/HCPCS Codes                                                                                            |
|---------------------------------------|---------------------------------------------------------------------------------------|-------------------------------------------------------------------------------|------------------------------------------------------------------------------------------------------------|
| Composite ASCVD                       | Myocardial Infarction, Ischemic Stroke, or ASCVD Death Codes                          |                                                                               |                                                                                                            |
| Composite ASCVD and Revascularization | Composite ASCVD, Percutaneous Coronary Intervention, and Coronary Artery Bypass Graft |                                                                               |                                                                                                            |
| Myocardial Infarction                 | 410, 411.0, I21, I22                                                                  | 410, 411.0, I21, I22                                                          |                                                                                                            |
| Ischemic Stroke                       | 433.x1, 434 (excluding 434.x0), 436, 437.0, 437.6                                     | I63.xx9, I63.20, I63.22, I63.30, I63.40, I63.50, I63.59, I67.2, I67.6, I67.89 |                                                                                                            |
| ASCVD Death                           |                                                                                       | I10, I11, I13, I16, I20-I25, I46, I63, I67, I70, I74, I75, G45                |                                                                                                            |
| Percutaneous Coronary Intervention    |                                                                                       |                                                                               | C9602-C9608, 92920-92921, 92924-92925, 92933-92934, 92937, 92995, 92966, 93540, 93564, 93570, 92928, 92929 |
| Coronary Artery Bypass Graft          |                                                                                       |                                                                               | C9600-C9608, G8574, 33510-33523, 33533-33536, 33572, excluding 3351F, 3352F, 3353F, 33515                  |

**eTable 3. Baseline Characteristics and ASCVD Events Stratified by Sex**

| Baseline Characteristic                                      | Number (%)                   |                      |                        |
|--------------------------------------------------------------|------------------------------|----------------------|------------------------|
|                                                              | Total cohort<br>(N = 79,151) | Male<br>(n = 68,503) | Female<br>(n = 10,648) |
| Follow-up, years, median (5th-95th percentile)               | 4.3 (0.7-6.9)                | 4.3 (0.7-6.9)        | 4.0 (0.5-6.8)          |
| Age, mean (SD), y                                            | 57.8 (13.7)                  | 59.3 (13.3)          | 48.6 (12.6)            |
| <b>Cardiovascular Risk Factors</b>                           |                              |                      |                        |
| Total cholesterol, mean (SD), mg/dL                          | 157.8 (40.6)                 | 157.3 (40.3)         | 161.4 (42.3)           |
| HDL-C, mean (SD), mg/dL                                      | 49.8 (17)                    | 48.6 (16.6)          | 57.4 (17.4)            |
| LDL-C, mean (SD), mg/dL                                      | 109.4 (33.3)                 | 108.6 (33.2)         | 114.4 (34.1)           |
| Systolic blood pressure, mean (SD), mm Hg                    | 131.3 (13.4)                 | 132.1 (13.2)         | 125.7 (13.1)           |
| Current smoker                                               | 8,435 (10.7)                 | 7,530 (11)           | 905 (8.5)              |
| Former smoker                                                | 47,670 (60.2)                | 42,705 (62.3)        | 4,965 (46.6)           |
| Never smoker                                                 | 23,046 (29.1)                | 18,268 (26.7)        | 4,778 (44.9)           |
| Diabetes                                                     | 17,177 (21.7)                | 15,643 (22.8)        | 1,534 (14.4)           |
| <b>Medications</b>                                           |                              |                      |                        |
| Blood pressure treatment                                     | 36,673 (46.3)                | 33,365 (48.7)        | 3,308 (31.1)           |
| <b>No. of events (2011 - 2018)</b>                           |                              |                      |                        |
| Composite ASCVD (%)                                          | 5,485 (6.9)                  | 5,175 (7.6)          | 310 (2.9)              |
| Composite ASCVD and revascularization (%)                    | 6,628 (8.4)                  | 6,265 (9.1)          | 363 (3.4)              |
| ASCVD Death (%)                                              | 867 (1.1)                    | 836 (1.2)            | 31 (0.3)               |
| Acute ischemic stroke (%)                                    | 1,933 (2.4)                  | 1,781 (2.6)          | 152 (1.4)              |
| Myocardial Infarction (%)                                    | 3,186 (4)                    | 3,036 (4.4)          | 150 (1.4)              |
| <b>Crude Incidence rate / 10k Person Years (2011 - 2018)</b> |                              |                      |                        |
| Composite ASCVD (95% CI)                                     | 177.7 (173.0-182.5)          | 193.0 (187.8-198.3)  | 76.4 (68.2-85.4)       |
| Composite ASCVD and revascularization (95% CI)               | 216.6 (211.4-221.9)          | 235.9 (230.1-241.8)  | 89.7 (80.7-99.5)       |
| ASCVD Death (95% CI)                                         | 27.0 (25.2-28.8)             | 29.9 (27.9-32.0)     | 7.5 (5.1-10.6)         |
| Acute ischemic stroke (95% CI)                               | 61.0 (58.3-63.8)             | 64.5 (61.5-67.6)     | 37.2 (31.5-43.6)       |
| Myocardial Infarction (95% CI)                               | 100.9 (97.4-104.4)           | 110.5 (106.6-114.5)  | 36.5 (30.9-42.9)       |

**eTable 4. Hazard Ratios for MVP Incident ASCVD Events for Low Traditional and Polygenic Risk Scores**

| High PRS definition          | Hazard Ratio (95% CI)  |                      |                        |                      |                        |                      |
|------------------------------|------------------------|----------------------|------------------------|----------------------|------------------------|----------------------|
|                              | Non-Hispanic White     |                      | Non-Hispanic Black     |                      | Hispanic               |                      |
|                              | Composite ASCVD Events | Polygenic Risk Score | Traditional Risk Score | Polygenic Risk Score | Traditional Risk Score | Polygenic Risk Score |
| Continuous per SD reduction  | 0.80 (0.77, 0.82)      | 0.48 (0.46, 0.50)    | 0.86 (0.81, 0.91)      | 0.45 (0.42, 0.48)    | 0.79 (0.72, 0.88)      | 0.35 (0.32, 0.40)    |
| Bottom 20%*                  | 0.75 (0.67, 0.84)      | 0.16 (0.13, 0.20)    | 0.95 (0.76, 1.19)      | 0.17 (0.12, 0.25)    | 0.74 (0.50, 1.10)      | N/A                  |
| Bottom 10%                   | 0.66 (0.58, 0.76)      | 0.10 (0.07, 0.14)    | 0.90 (0.68, 1.18)      | N/A                  | 0.76 (0.47, 1.24)      | N/A                  |
| Bottom 5%                    | 0.64 (0.54, 0.76)      | N/A                  | 0.79 (0.55, 1.15)      | N/A                  | N/A                    | N/A                  |
| Bottom 1%                    | 0.61 (0.42, 0.86)      | N/A                  | N/A                    | N/A                  | N/A                    | N/A                  |
| Bottom 0.5%                  | N/A**                  | N/A                  | N/A                    | N/A                  | N/A                    | N/A                  |
| <b>Myocardial Infarction</b> |                        |                      |                        |                      |                        |                      |
| Continuous per SD reduction  | 0.75 (0.73, 0.78)      | 0.52 (0.50, 0.54)    | 0.88 (0.82, 0.94)      | 0.47 (0.44, 0.51)    | 0.77 (0.68, 0.87)      | 0.36 (0.31, 0.41)    |
| Bottom 20%                   | 0.70 (0.61, 0.81)      | 0.19 (0.15, 0.24)    | 0.89 (0.67, 1.17)      | 0.23 (0.15, 0.35)    | 0.40 (0.25, 0.66)      | N/A                  |
| Bottom 10%                   | 0.63 (0.53, 0.75)      | N/A                  | 0.88 (0.63, 1.23)      | N/A                  | 0.52 (0.30, 0.91)      | N/A                  |
| Bottom 5%                    | 0.60 (0.48, 0.75)      | N/A                  | 0.62 (0.39, 0.99)      | N/A                  | N/A                    | N/A                  |
| Bottom 1%                    | N/A                    | N/A                  | N/A                    | N/A                  | N/A                    | N/A                  |
| Bottom 0.5%                  | N/A                    | N/A                  | N/A                    | N/A                  | N/A                    | N/A                  |
| <b>Ischemic Stroke</b>       |                        |                      |                        |                      |                        |                      |
| Continuous per SD reduction  | 0.89 (0.84, 0.94)      | 0.48 (0.45, 0.52)    | 0.87 (0.78, 0.96)      | 0.43 (0.39, 0.48)    | 0.85 (0.69, 1.04)      | 0.36 (0.29, 0.44)    |
| Bottom 20%                   | 0.91 (0.72, 1.14)      | 0.23 (0.16, 0.33)    | 0.92 (0.63, 1.35)      | N/A                  | 0.76 (0.35, 1.63)      | N/A                  |
| Bottom 10%                   | 0.95 (0.73, 1.24)      | N/A                  | 0.75 (0.45, 1.24)      | N/A                  | N/A                    | N/A                  |
| Bottom 5%                    | 0.83 (0.59, 1.16)      | N/A                  | 0.97 (0.51, 1.83)      | N/A                  | N/A                    | N/A                  |
| Bottom 1%                    | N/A                    | N/A                  | N/A                    | N/A                  | N/A                    | N/A                  |
| Bottom 0.5%                  | N/A                    | N/A                  | N/A                    | N/A                  | N/A                    | N/A                  |
| <b>ASCVD Death</b>           |                        |                      |                        |                      |                        |                      |
| Continuous per SD reduction  | 0.82 (0.77, 0.88)      | 0.29 (0.26, 0.32)    | 0.89 (0.77, 1.03)      | 0.31 (0.26, 0.37)    | 0.85 (0.68, 1.07)      | 0.25 (0.19, 0.34)    |
| Bottom 20%                   | 0.82 (0.62, 1.08)      | N/A                  | 0.58 (0.34, 0.99)      | N/A                  | N/A                    | N/A                  |
| Bottom 10%                   | 0.67 (0.48, 0.94)      | N/A                  | 0.78 (0.42, 1.44)      | N/A                  | N/A                    | N/A                  |
| Bottom 5%                    | 0.64 (0.42, 0.97)      | N/A                  | N/A                    | N/A                  | N/A                    | N/A                  |
| Bottom 1%                    | N/A                    | N/A                  | N/A                    | N/A                  | N/A                    | N/A                  |
| Bottom 0.5%                  | N/A                    | N/A                  | N/A                    | N/A                  | N/A                    | N/A                  |

\* Reference group = middle 10% (45th to 55th percentiles) of risk score

\*\* N/A = <10 events in the selected risk group.

**eTable 5. Reclassification of 5-Year Predicted Myocardial Infarction Including Both Statin-Naïve and Statin Users**

Correctly  
Reclassified

Incorrectly  
Reclassified

**A. All participants**

|             |                   | Traditional x Polygenic Risk Score (GxE) Model |             |             |
|-------------|-------------------|------------------------------------------------|-------------|-------------|
| Events      | Traditional Model | ≤ 3.75%                                        | > 3.75%     | Total N (%) |
|             | ≤ 3.75%           |                                                | 786         | 186         |
| > 3.75%     |                   | 146                                            | 2360        | 2506 (72.1) |
| Total N (%) |                   | 932 (26.8)                                     | 2546 (73.2) | 3478 (100)  |

  

|             |                   | Traditional x Polygenic Risk Score (GxE) Model |              |              |
|-------------|-------------------|------------------------------------------------|--------------|--------------|
| Nonevents   | Traditional Model | ≤ 3.75%                                        | > 3.75%      | Total N (%)  |
|             | ≤ 3.75%           |                                                | 18657        | 1714         |
| > 3.75%     |                   | 2451                                           | 17432        | 19883 (49.4) |
| Total N (%) |                   | 21108 (52.4)                                   | 19146 (47.6) | 40254 (100)  |

**B. Non-Hispanic White**

|             |                   | Traditional x Polygenic Risk Score (GxE) Model |             |             |
|-------------|-------------------|------------------------------------------------|-------------|-------------|
| Events      | Traditional Model | ≤ 3.75%                                        | > 3.75%     | Total N (%) |
|             | ≤ 3.75%           |                                                | 459         | 149         |
| > 3.75%     |                   | 125                                            | 1811        | 1936 (76.1) |
| Total N (%) |                   | 584 (23.0)                                     | 1960 (77.0) | 2544 (100)  |

  

|             |                   | Traditional x Polygenic Risk Score (GxE) Model |              |              |
|-------------|-------------------|------------------------------------------------|--------------|--------------|
| Nonevents   | Traditional Model | ≤ 3.75%                                        | > 3.75%      | Total N (%)  |
|             | ≤ 3.75%           |                                                | 10645        | 1392         |
| > 3.75%     |                   | 2111                                           | 13248        | 15359 (56.1) |
| Total N (%) |                   | 12756 (46.6)                                   | 14640 (53.4) | 27396 (100)  |

**C. Non-Hispanic Black**

|             |                   | Traditional x Polygenic Risk Score (GxE) Model |            |             |
|-------------|-------------------|------------------------------------------------|------------|-------------|
| Events      | Traditional Model | ≤ 3.75%                                        | > 3.75%    | Total N (%) |
|             | ≤ 3.75%           |                                                | 241        | 23          |
| > 3.75%     |                   | 14                                             | 403        | 417 (61.2)  |
| Total N (%) |                   | 255 (37.4)                                     | 426 (62.6) | 681 (100)   |

  

|             |                   | Traditional x Polygenic Risk Score (GxE) Model |             |             |
|-------------|-------------------|------------------------------------------------|-------------|-------------|
| Nonevents   | Traditional Model | ≤ 3.75%                                        | > 3.75%     | Total N (%) |
|             | ≤ 3.75%           |                                                | 5668        | 224         |
| > 3.75%     |                   | 200                                            | 3120        | 3320 (36.0) |
| Total N (%) |                   | 5868 (63.7)                                    | 3344 (36.3) | 9212 (100)  |

**D. Hispanic**

|             |                   | Traditional x Polygenic Risk Score (GxE) Model |            |             |
|-------------|-------------------|------------------------------------------------|------------|-------------|
| Events      | Traditional Model | ≤ 3.75%                                        | > 3.75%    | Total N (%) |
|             | ≤ 3.75%           |                                                | 86         | 14          |
| > 3.75%     |                   | 7                                              | 146        | 153 (60.5)  |
| Total N (%) |                   | 93 (36.8)                                      | 160 (63.2) | 253 (100)   |

  

|             |                   | Traditional x Polygenic Risk Score (GxE) Model |             |             |
|-------------|-------------------|------------------------------------------------|-------------|-------------|
| Nonevents   | Traditional Model | ≤ 3.75%                                        | > 3.75%     | Total N (%) |
|             | ≤ 3.75%           |                                                | 2344        | 98          |
| > 3.75%     |                   | 140                                            | 1064        | 1204 (33.0) |
| Total N (%) |                   | 2484 (68.1)                                    | 1162 (31.9) | 3646 (100)  |

**eTable 6. Reclassification of 5-Year Predicted Acute Ischemic Stroke Including Both Statin-Naïve and Statin Users**

Correctly  
Reclassified

Incorrectly  
Reclassified

**A. All participants**

|                    |                   | Traditional x Polygenic Risk Score (GxE) Model |            |             |
|--------------------|-------------------|------------------------------------------------|------------|-------------|
| Events             | Traditional Model | ≤ 3.75%                                        | > 3.75%    | Total N (%) |
|                    | ≤ 3.75%           |                                                | 1276       | 49          |
| > 3.75%            |                   | 32                                             | 239        | 271 (17.0)  |
| <b>Total N (%)</b> |                   | 1308 (82.0)                                    | 288 (18.0) | 1596 (100)  |

  

|                    |                   | Traditional x Polygenic Risk Score (GxE) Model |            |             |
|--------------------|-------------------|------------------------------------------------|------------|-------------|
| Nonevents          | Traditional Model | ≤ 3.75%                                        | > 3.75%    | Total N (%) |
|                    | ≤ 3.75%           |                                                | 37290      | 534         |
| > 3.75%            |                   | 465                                            | 2249       | 2714 (6.7)  |
| <b>Total N (%)</b> |                   | 37755 (93.1)                                   | 2783 (6.9) | 40538 (100) |

**B. Non-Hispanic White**

|                    |                   | Traditional x Polygenic Risk Score (GxE) Model |            |             |
|--------------------|-------------------|------------------------------------------------|------------|-------------|
| Events             | Traditional Model | ≤ 3.75%                                        | > 3.75%    | Total N (%) |
|                    | ≤ 3.75%           |                                                | 871        | 32          |
| > 3.75%            |                   | 21                                             | 124        | 145 (13.8)  |
| <b>Total N (%)</b> |                   | 892 (85.1)                                     | 156 (14.9) | 1048 (100)  |

  

|                    |                   | Traditional x Polygenic Risk Score (GxE) Model |            |             |
|--------------------|-------------------|------------------------------------------------|------------|-------------|
| Nonevents          | Traditional Model | ≤ 3.75%                                        | > 3.75%    | Total N (%) |
|                    | ≤ 3.75%           |                                                | 25853      | 354         |
| > 3.75%            |                   | 291                                            | 1186       | 1477 (5.3)  |
| <b>Total N (%)</b> |                   | 26144 (94.4)                                   | 1540 (5.6) | 27684 (100) |

**C. Non-Hispanic Black**

|                    |                   | Traditional x Polygenic Risk Score (GxE) Model |            |             |
|--------------------|-------------------|------------------------------------------------|------------|-------------|
| Events             | Traditional Model | ≤ 3.75%                                        | > 3.75%    | Total N (%) |
|                    | ≤ 3.75%           |                                                | 303        | 15          |
| > 3.75%            |                   | 11                                             | 106        | 117 (26.9)  |
| <b>Total N (%)</b> |                   | 314 (72.2)                                     | 121 (27.8) | 435 (100)   |

  

|                    |                   | Traditional x Polygenic Risk Score (GxE) Model |             |             |
|--------------------|-------------------|------------------------------------------------|-------------|-------------|
| Nonevents          | Traditional Model | ≤ 3.75%                                        | > 3.75%     | Total N (%) |
|                    | ≤ 3.75%           |                                                | 7922        | 164         |
| > 3.75%            |                   | 157                                            | 956         | 1113 (12.1) |
| <b>Total N (%)</b> |                   | 8079 (87.8)                                    | 1120 (12.2) | 9199 (100)  |

**D. Hispanic**

|                    |                   | Traditional x Polygenic Risk Score (GxE) Model |          |             |
|--------------------|-------------------|------------------------------------------------|----------|-------------|
| Events             | Traditional Model | ≤ 3.75%                                        | > 3.75%  | Total N (%) |
|                    | ≤ 3.75%           |                                                | 102      | 2           |
| > 3.75%            |                   | 0                                              | 9        | 9 (8.0)     |
| <b>Total N (%)</b> |                   | 102 (90.3)                                     | 11 (9.7) | 113 (100)   |

  

|                    |                   | Traditional x Polygenic Risk Score (GxE) Model |           |             |
|--------------------|-------------------|------------------------------------------------|-----------|-------------|
| Nonevents          | Traditional Model | ≤ 3.75%                                        | > 3.75%   | Total N (%) |
|                    | ≤ 3.75%           |                                                | 3515      | 16          |
| > 3.75%            |                   | 17                                             | 107       | 124 (3.4)   |
| <b>Total N (%)</b> |                   | 3532 (96.6)                                    | 123 (3.4) | 3655 (100)  |

**eTable 7. Reclassification of 5-Year Predicted ASCVD Death Including Both Statin-Naïve and Statin Users**

Correctly  
Reclassified

Incorrectly  
Reclassified

**A. All participants**

|                    |                   | Traditional x Polygenic Risk Score (GxE) Model |            |             |
|--------------------|-------------------|------------------------------------------------|------------|-------------|
| Events             | Traditional Model | ≤ 3.75%                                        | > 3.75%    | Total N (%) |
|                    | ≤ 3.75%           |                                                | 716        | 21          |
| > 3.75%            |                   | 15                                             | 172        | 187 (20.2)  |
| <b>Total N (%)</b> |                   | 731 (79.1)                                     | 193 (20.9) | 924 (100)   |

  

|                    |                   | Traditional x Polygenic Risk Score (GxE) Model |            |             |
|--------------------|-------------------|------------------------------------------------|------------|-------------|
| Nonevents          | Traditional Model | ≤ 3.75%                                        | > 3.75%    | Total N (%) |
|                    | ≤ 3.75%           |                                                | 38832      | 256         |
| > 3.75%            |                   | 249                                            | 1602       | 1851 (4.5)  |
| <b>Total N (%)</b> |                   | 39081 (95.5)                                   | 1858 (4.5) | 40939 (100) |

**B. Non-Hispanic White**

|                    |                   | Traditional x Polygenic Risk Score (GxE) Model |            |             |
|--------------------|-------------------|------------------------------------------------|------------|-------------|
| Events             | Traditional Model | ≤ 3.75%                                        | > 3.75%    | Total N (%) |
|                    | ≤ 3.75%           |                                                | 508        | 19          |
| > 3.75%            |                   | 13                                             | 149        | 162 (23.5)  |
| <b>Total N (%)</b> |                   | 521 (75.6)                                     | 168 (24.4) | 689 (100)   |

  

|                    |                   | Traditional x Polygenic Risk Score (GxE) Model |            |             |
|--------------------|-------------------|------------------------------------------------|------------|-------------|
| Nonevents          | Traditional Model | ≤ 3.75%                                        | > 3.75%    | Total N (%) |
|                    | ≤ 3.75%           |                                                | 26142      | 231         |
| > 3.75%            |                   | 219                                            | 1332       | 1551 (5.6)  |
| <b>Total N (%)</b> |                   | 26361 (94.4)                                   | 1563 (5.6) | 27924 (100) |

**C. Non-Hispanic Black**

|                    |                   | Traditional x Polygenic Risk Score (GxE) Model |          |             |
|--------------------|-------------------|------------------------------------------------|----------|-------------|
| Events             | Traditional Model | ≤ 3.75%                                        | > 3.75%  | Total N (%) |
|                    | ≤ 3.75%           |                                                | 155      | 2           |
| > 3.75%            |                   | 2                                              | 15       | 17 (9.8)    |
| <b>Total N (%)</b> |                   | 157 (90.2)                                     | 17 (9.8) | 174 (100)   |

  

|                    |                   | Traditional x Polygenic Risk Score (GxE) Model |           |             |
|--------------------|-------------------|------------------------------------------------|-----------|-------------|
| Nonevents          | Traditional Model | ≤ 3.75%                                        | > 3.75%   | Total N (%) |
|                    | ≤ 3.75%           |                                                | 9099      | 18          |
| > 3.75%            |                   | 23                                             | 194       | 217 (2.3)   |
| <b>Total N (%)</b> |                   | 9122 (97.7)                                    | 212 (2.3) | 9334 (100)  |

**D. Hispanic**

|                    |                   | Traditional x Polygenic Risk Score (GxE) Model |          |             |
|--------------------|-------------------|------------------------------------------------|----------|-------------|
| Events             | Traditional Model | ≤ 3.75%                                        | > 3.75%  | Total N (%) |
|                    | ≤ 3.75%           |                                                | 53       | 0           |
| > 3.75%            |                   | 0                                              | 8        | 8 (13.1)    |
| <b>Total N (%)</b> |                   | 53 (86.9)                                      | 8 (13.1) | 61 (100)    |

  

|                    |                   | Traditional x Polygenic Risk Score (GxE) Model |          |             |
|--------------------|-------------------|------------------------------------------------|----------|-------------|
| Nonevents          | Traditional Model | ≤ 3.75%                                        | > 3.75%  | Total N (%) |
|                    | ≤ 3.75%           |                                                | 3591     | 7           |
| > 3.75%            |                   | 7                                              | 76       | 83 (2.3)    |
| <b>Total N (%)</b> |                   | 3598 (97.7)                                    | 83 (2.3) | 3681 (100)  |



**eTable 8. Net Reclassification Improvement From Inclusion of Polygenic Scores Stratified by Age and Sex**

| 5-year Risk Group          | Subgroup     | Net Reclassified |           | Total N |           | NRI+   | NRI-   | NRI [95% CI]          |
|----------------------------|--------------|------------------|-----------|---------|-----------|--------|--------|-----------------------|
|                            |              | Event            | Non-Event | Event   | Non-event |        |        |                       |
| Intermediate (3.75% - 10%) | Male         | -4               | 110       | 4731    | 23856     | -0.08% | 0.46%  | 0.38% [0.07%, 0.68%]  |
|                            | Female       | 20               | -6        | 287     | 3450      | 6.97%  | -0.17% | 6.79% [3.01%, 10.58%] |
|                            | >55 yrs      | -6               | 72        | 4151    | 18267     | -0.14% | 0.39%  | 0.25% [0.03%, 0.47%]  |
|                            | 40 to 55 yrs | -2               | 122       | 777     | 6526      | -0.26% | 1.87%  | 1.61% [-0.07%, 3.30%] |
| High (≥10%)                | Male         | 62               | 140       | 4731    | 23856     | 1.31%  | 0.59%  | 1.90% [0.97%, 2.82%]  |
|                            | Female       | 5                | 15        | 287     | 3450      | 1.74%  | 0.43%  | 2.18% [0.11%, 4.24%]  |
|                            | >55 yrs      | 31               | 194       | 4151    | 18267     | 0.75%  | 1.06%  | 1.81% [0.81%, 2.81%]  |
|                            | 40 to 55 yrs | 33               | -69       | 777     | 6526      | 4.25%  | -1.06% | 3.19% [1.41%, 4.97%]  |

eTable 8 contains an abbreviated reclassification table for all ancestries combined. Net reclassified events are the number of events reclassified upwards (into the Intermediate or High risk groups) minus the number of events reclassified downwards. Net reclassified non-events are the number of non-events reclassified downwards minus the number of events reclassified upwards. The traditional model includes age, sex, and 5 principal components of genetic ancestry (to be comparable to the genetic model), and the 5-year risk cutoffs are half the clinically relevant 10-year risk thresholds from the ACC2019 guidelines. Among ASCVD events in the middle-aged subgroup (ages 40 to 55 years), the net proportion of correct reclassifications was  $NRI+ = 33/777 = 4.25\%$ , and among non-events was  $NRI- = -69/6526 = -1.06\%$ . The overall net reclassification index is defined as the sum of the net reclassification proportions for events and nonevents ( $NRI = 4.25\% + -1.06\% = 3.19\%$ ).

**eFigure 1. Cumulative Incidence of ASCVD Events**

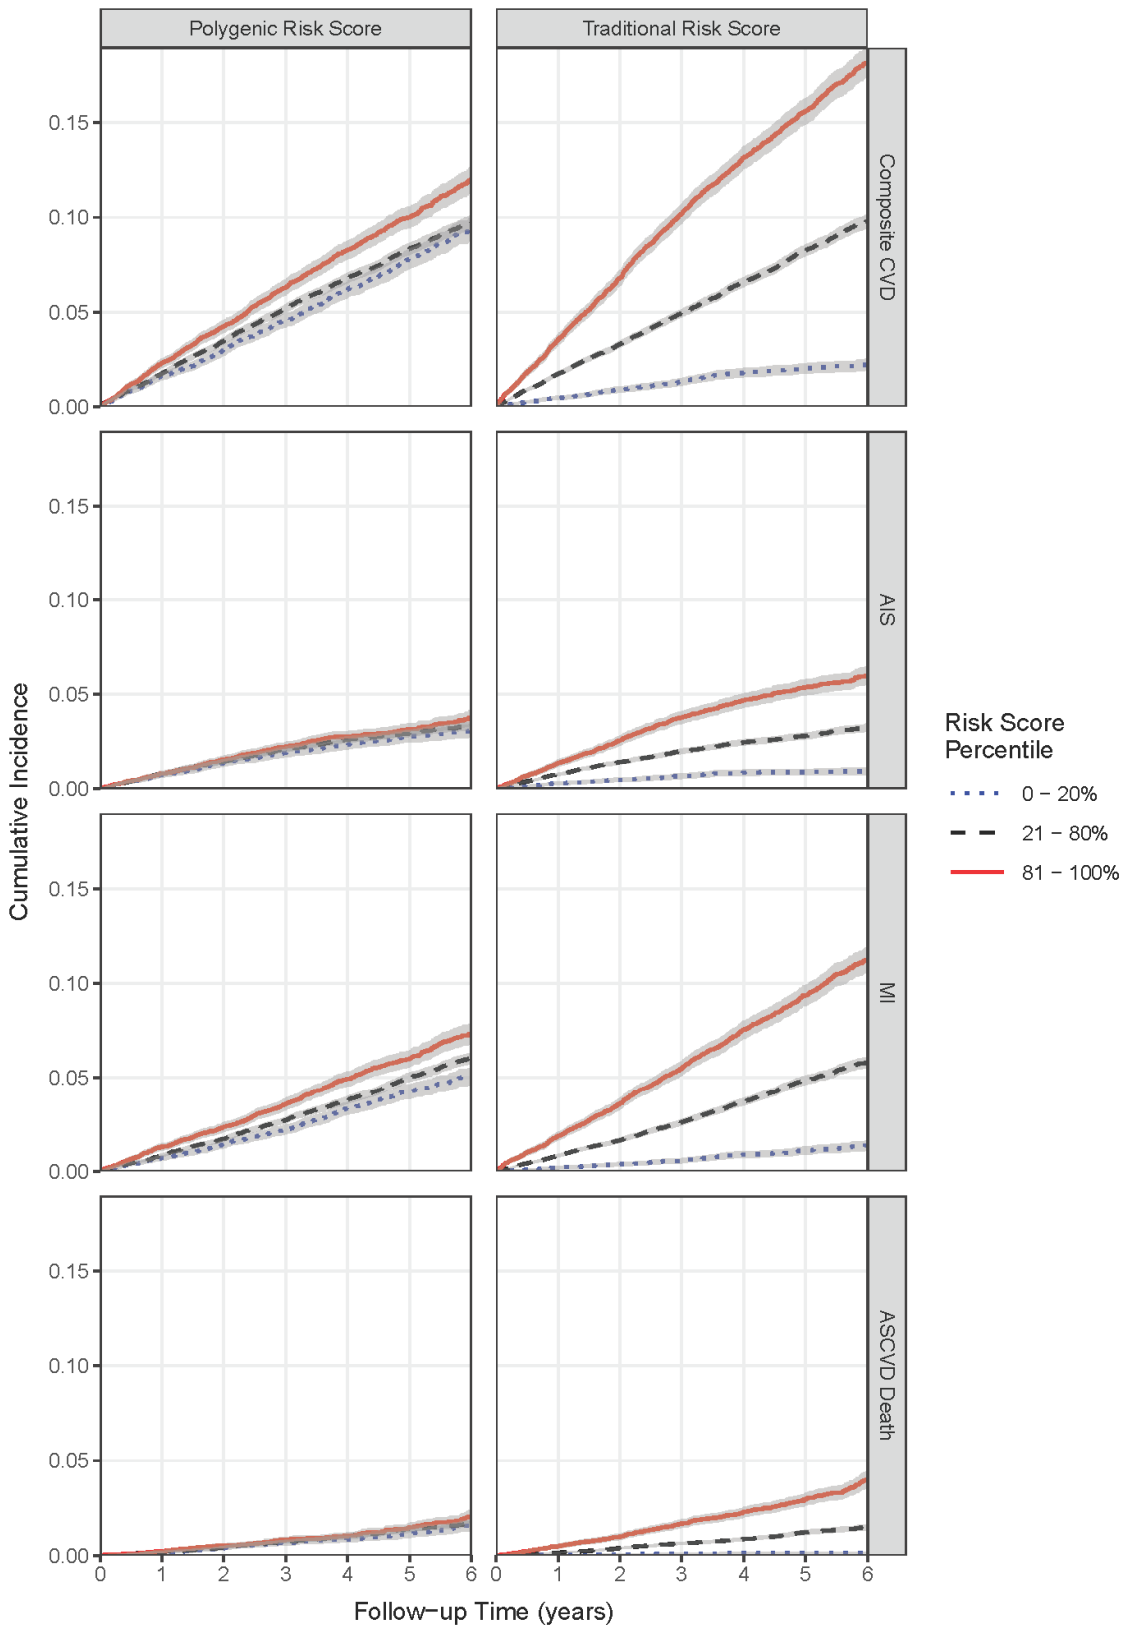

**eFigure 1 caption:** Cumulative incidence of Composite ASCVD, Acute Ischemic Stroke, Myocardial Infarction (MI), and ASCVD Death are plotted over 6 years of follow up according to percentile groups for Polygenic Risk Scores and Traditional Risk Scores.

**Key:** Risk score percentile 0-20% (dotted, blue), 21-80% (dashed, black), 81-100% (solid, red).

**eFigure 2. Categorical Net Reclassification Index for Incident Composite ASCVD Among Statin-Naïve Participants Outcomes Stratified by Age Group**

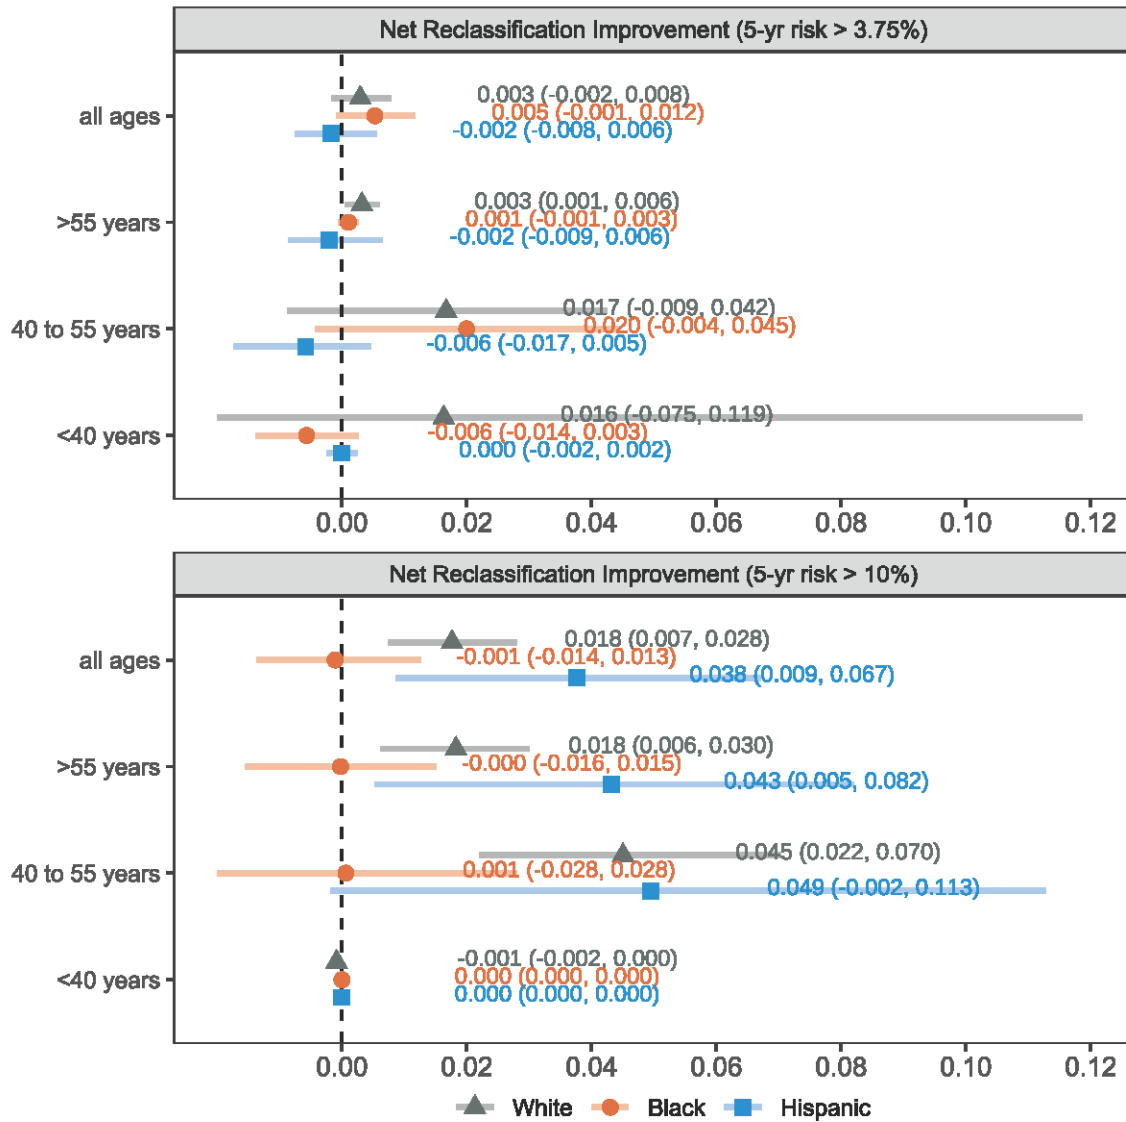

**eFigure 2 caption:**

**Top Panel:** Categorical Net Reclassification Improvement for intermediate risk (5-year risk >3.75%) among statin-naïve patients is shown for Composite ASCVD, Myocardial Infarction, Ischemic Stroke, and ASCVD Death.

**Bottom Panel:** Categorical Net Reclassification Improvement for high risk (5-year risk >10%) among statin-naïve patients is shown for Composite ASCVD, Myocardial Infarction, Ischemic Stroke, and ASCVD Death.

**Key:** Estimates and 95% confidence intervals are shown for White (black, triangle), Black (red, circle), and Hispanic (blue, square) population groups.

**eFigure 3. Net Reclassification Index for Intermediate Risk (5-year risk > 3.75%) From Inclusion of Polygenic Risk Scores Including Statin Users Stratified by Age**

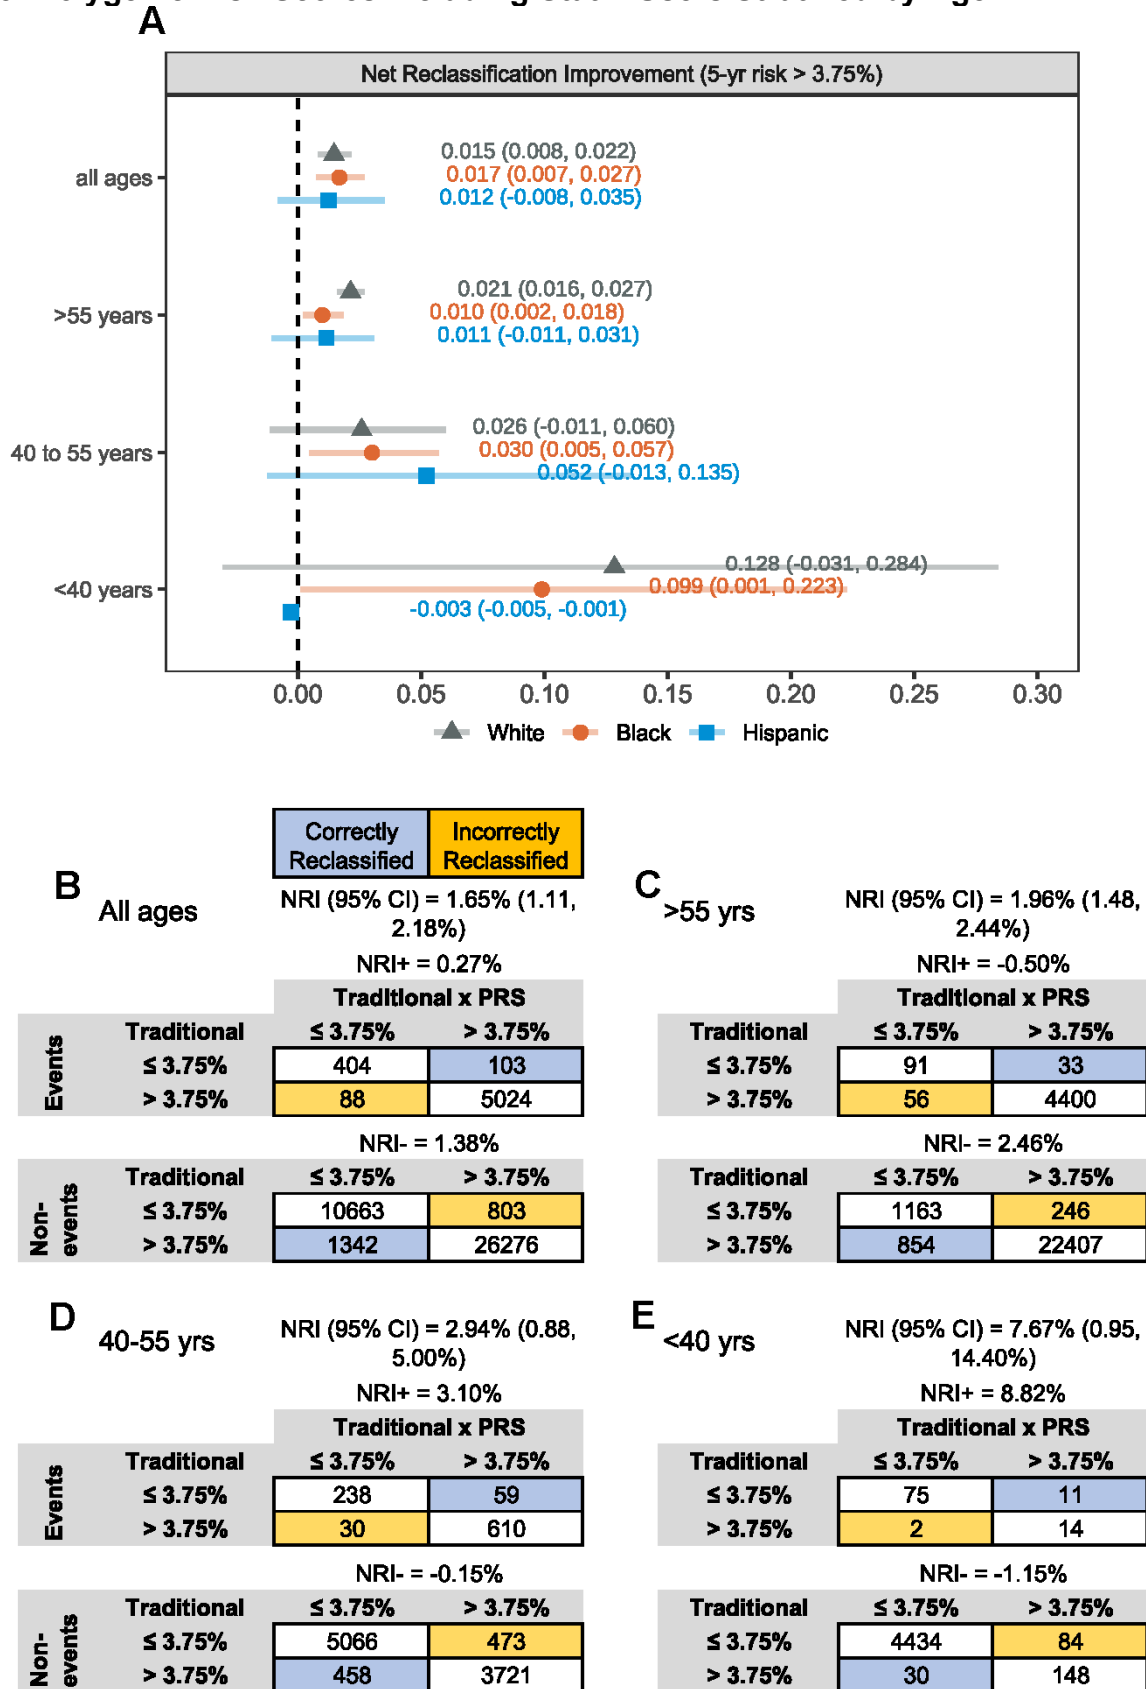

**eFigure 3 caption:** Panel A presents net reclassification improvement (NRI) from the addition of polygenic scores to the traditional risk model for each ASCVD outcome, stratified by ancestry and age group. Panels B to E contain

reclassification tables for all ancestries combined, stratified by age group. Rows refer to predicted 5-year risk categories from the traditional risk model, and columns refer to predicted risk from the combined traditional and polygenic risk score model. Blue cells indicate correct reclassifications: i.e. the GxE model predicted a higher risk group, compared to the traditional model, for a patient who experienced an event, or a lower risk group for a non-event. Orange shaded cells highlight incorrect reclassifications. The traditional model includes age, sex, and 5 principal components of genetic ancestry (to be comparable to the genetic model), and the risk cutoff (>3.75%) represents a clinically relevant 5-year risk. Among ASCVD events in the youngest subgroup (ages < 40, panel E), the net proportion of correct reclassifications was  $NRI+ = (11-2)/102 = 8.82\%$ , and among non-events was  $NRI- = (30-84)/4696 = -1.15\%$ . The overall net reclassification index is defined as the sum of the net reclassification proportions for events and nonevents ( $NRI = 8.82\% + -1.15\% = 7.67\%$ ).

**Key:** Estimates and 95% confidence intervals are shown for White (black, triangle), Black (red, circle), and Hispanic (blue, square) population groups.

### eFigure 4. Age of Onset for Incident Composite ASCVD Events

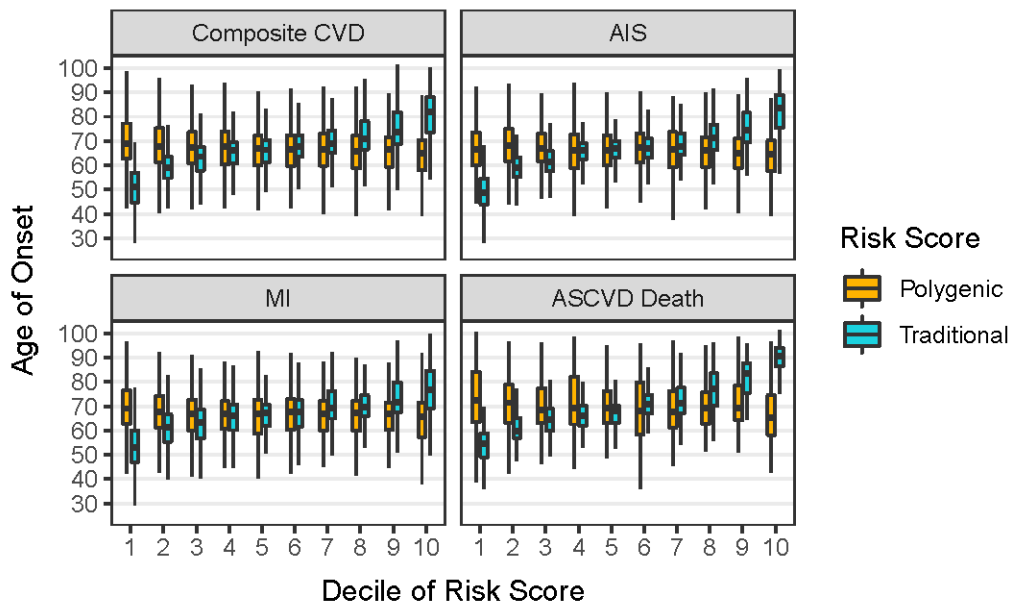

**eFigure 4 Caption:** Boxplots are shown for the age of onset of incident ASCVD events by decile of traditional and polygenic risk scores. The lower and upper hinges correspond to the first and third quartiles (25<sup>th</sup> and 75<sup>th</sup> percentiles) of age of onset within each risk score decile, while the whiskers extend from the lower (or upper) hinge to the smallest (or largest) observed age that is at most 1.5 times the interquartile range (IQR = 25<sup>th</sup> – 75<sup>th</sup> percentile) away from the box. Median age at incident event increased monotonically across deciles of traditional risk score by approximately 2.8 years per decile for composite ASCVD events, 3.1 years for ischemic stroke, 1.7 years for MI, and 3.9 years for ASCVD death. For composite ASCVD, this translated to a difference of 25 years between median age of onset in the lowest decile (50 years) compared to the top decile (75 years). On the other hand, age of onset decreased slightly across deciles of PRS by approximately 0.3 years per decile for composite ASCVD and 0.4 years per decile for ASCVD death; age of onset was effectively constant at approximately 65 years of age across deciles of PRS for ischemic stroke and MI.

# eFigure 5. Continuous and Categorical Net Reclassification Index for Incident ASCVD Outcomes

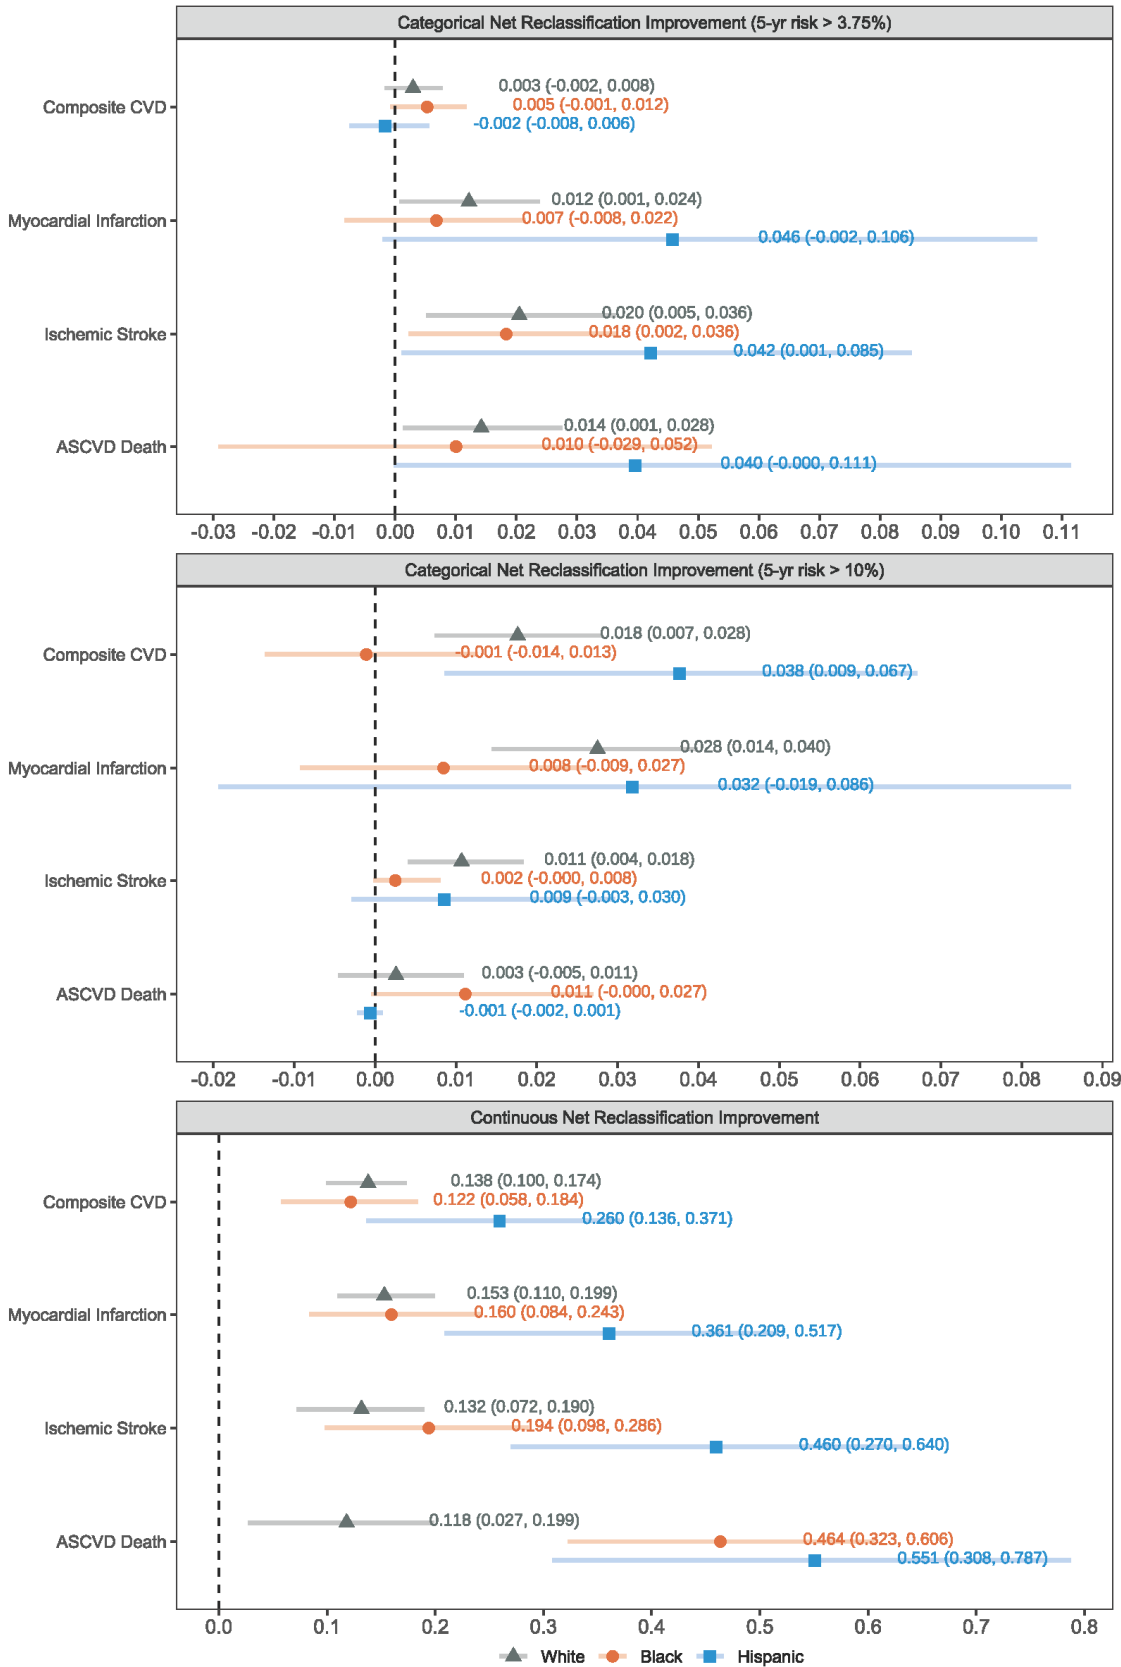

eFigure 5 caption:

**Top Panel:** Categorical Net Reclassification Improvement for intermediate risk (5-year risk >3.75%) is shown for Composite ASCVD, Myocardial Infarction, Ischemic Stroke, and ASCVD Death.

**Middle Panel:** Categorical Net Reclassification Improvement for high risk (5-year risk >10%) is shown for Composite ASCVD, Myocardial Infarction, Ischemic Stroke, and ASCVD Death.

**Bottom Panel:** Continuous Net Reclassification Improvement for 5-year risk is shown for Composite ASCVD, Myocardial Infarction, Ischemic Stroke, and ASCVD Death.

**Key:** Estimates and 95% confidence intervals are shown for White (black, triangle), Black (red, circle), and Hispanic (blue, square) population groups.
