# Supplementary material
Source: PubMed Central journal article supplement (PMC10157509)
Supplement: jamacardiol-e230857-s002.pdf [file jamacardiol-e230857-s002.pdf]

## Data Sharing Statement

Vassy. Cardiovascular Disease Risk Assessment Using Traditional Risk Factors and Polygenic Risk Scores in the Million Veteran Program. *JAMA Cardiol.* Published May 03, 2023.  
doi:10.1001/jamacardio.2023.0857

### Data

**Data available:** No
